# Supplementary material for: Ion-assisted self-assembly of macroporous MXene films as supercapacitor electrodes
Source: Royal Society of Chemistry journal article supplement (doi:10.1039/c9tc05595a), 2019-12-20
Supplement: c9tc05595a1.pdf [file c9tc05595a1.pdf]

# **Ion-Assisted Self-Assembly of Macroporous MXene Film as supercapacitor electrodes**

Xuefeng Zhang<sup>§</sup>, Xudong Liu<sup>§</sup>, Runze Yan, Jianqun Yang, Yong Liu\*, Shangli Dong\*

School of Materials Science and Engineering, Harbin Institute of Technology, Harbin, 150001, R.P.

China

E-mail: liuy@hit.edu.cn (Y. Liu).

## Methods for calculation of specific capacitance

### 1. Three-electrode system

#### CV test

The gravimetric capacitances were calculated according to the following equations:

$$C_g = \frac{\int Idv}{v \times V \times m} \quad (1)$$

$$C_a = \frac{C_g m}{S} \quad (2)$$

Where  $C_g$  (F g<sup>-1</sup>) is the specific capacitance of the electrode,  $I$  (A) is the charge-discharge current,  $v$  (V/s) scan rate,  $m$  (g) is the mass of the working electrode.  $V$  (V) is voltage window,  $C_a$  (mF cm<sup>-2</sup>) is the areal capacitance of the electrode,  $S$  (cm<sup>2</sup>) denotes the area of the electrode.

### 2. Capacitive contribution

The distinguish and quantify the capacitive contribution to the overall current response, it used the following formula (3):

$$C = K_1 + K_2 V^{-0.5} \quad (3)$$

Since the current response at a fixed potential is attributed to two separate mechanisms, i.e surface capacitive effects (surface capacitive effects: from EDLC and pseudocapacitance), and intercalation pseudocapacitance (from diffusion-controlled insertion processes), formula (3) demonstrates that the total capacitance  $C$  on the basis of CV experiment contain scan be divided into a rate-independent component  $K_1$ , and a diffusion-limited component  $K_2 V^{-0.5}$  that controlled by scanning rate ( intercalation pseudocapacitance ).

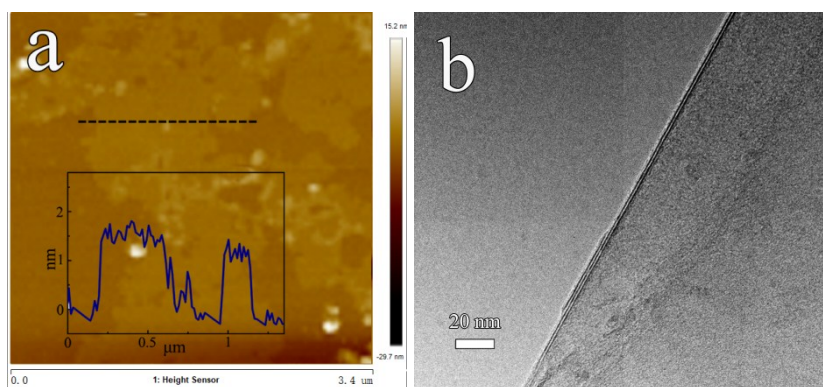

Fig.S1 TEM and AFM image of as-prepared  $\text{Ti}_3\text{C}_2\text{T}_x$  nanosheets and (a) TEM image, (b)AFM images

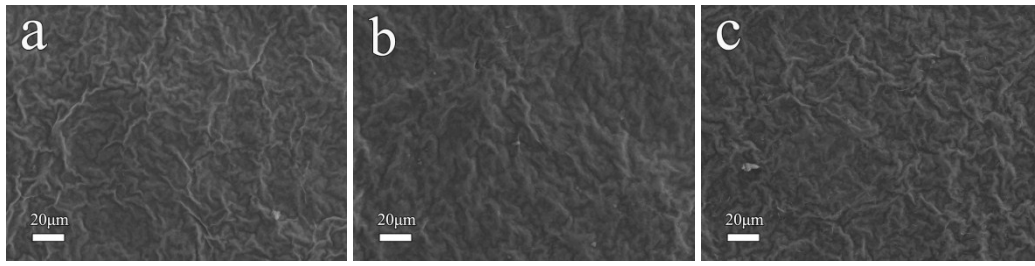

Fig.S2 Top-view SEM images of (a) Ti<sub>3</sub>C<sub>2</sub>T<sub>x</sub>-A, (a) Ti<sub>3</sub>C<sub>2</sub>T<sub>x</sub>-H and Ti<sub>3</sub>C<sub>2</sub>T<sub>x</sub>-K

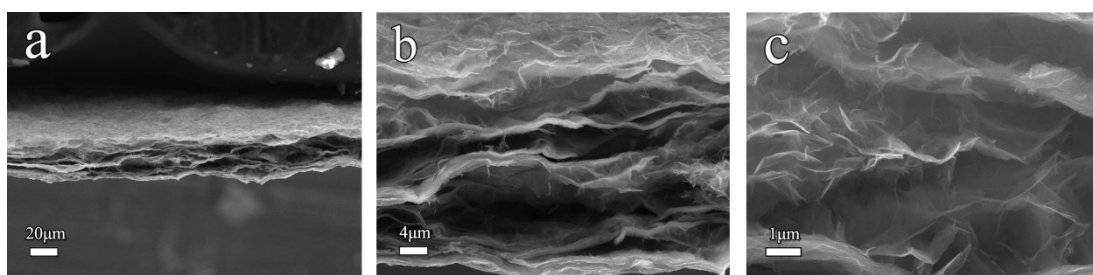

Fig.S3 (a) , (b) and (c) Cross-sectional SEM images of  $\text{Ti}_3\text{C}_2\text{T}_x\text{-H}$

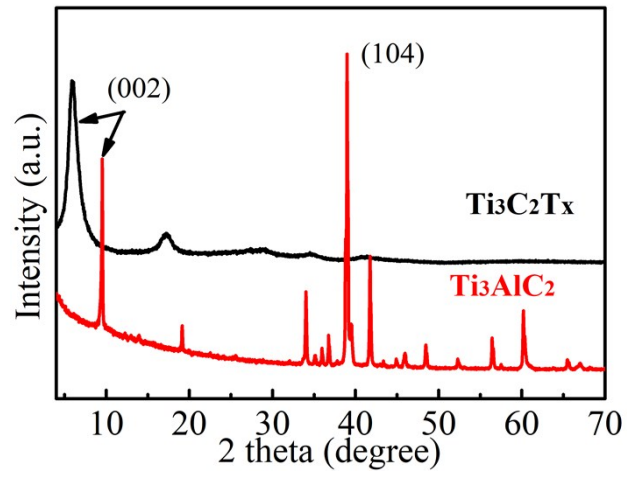

Fig.S4 XRD patterns of  $\text{Ti}_3\text{AlC}_2\text{T}_x$  and  $\text{Ti}_3\text{C}_2\text{T}_x$

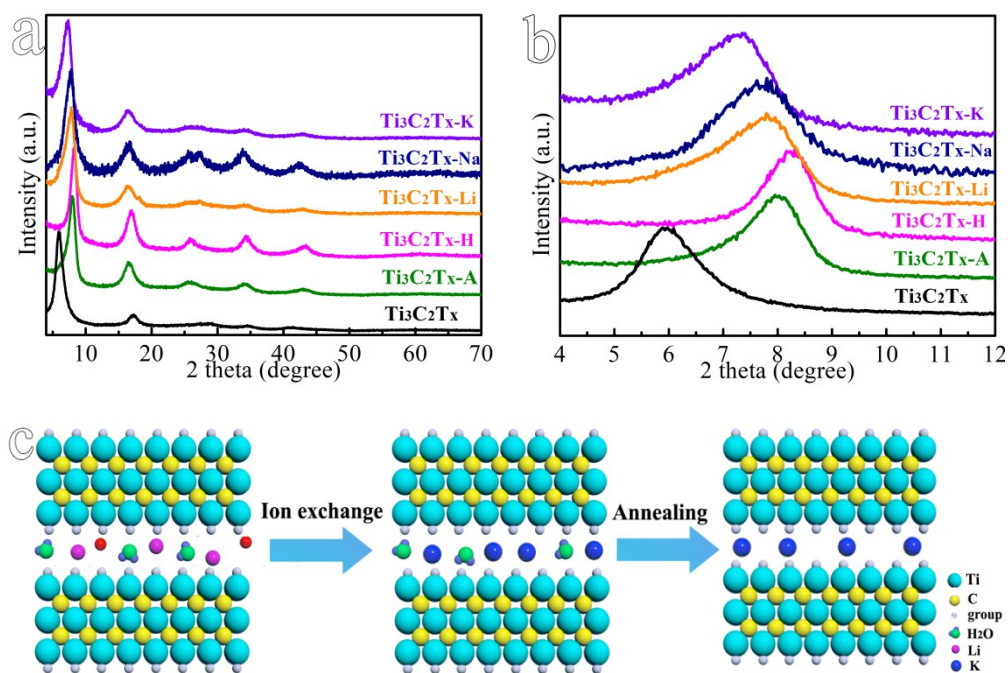

Fig.S5 (a) XRD patterns of  $\text{Ti}_3\text{C}_2\text{T}_\text{x}$ ,  $\text{Ti}_3\text{C}_2\text{T}_\text{x}\text{-A}$ ,  $\text{Ti}_3\text{C}_2\text{T}_\text{x}\text{-H}$ ,  $\text{Ti}_3\text{C}_2\text{T}_\text{x}\text{-Li}$ ,  $\text{Ti}_3\text{C}_2\text{T}_\text{x}\text{-Na}$  and  $\text{Ti}_3\text{C}_2\text{T}_\text{x}\text{-K}$ , (b) detailed XRD patterns showing (002) peaks, (c) A schematic illustration of the change of interlayer spacing.

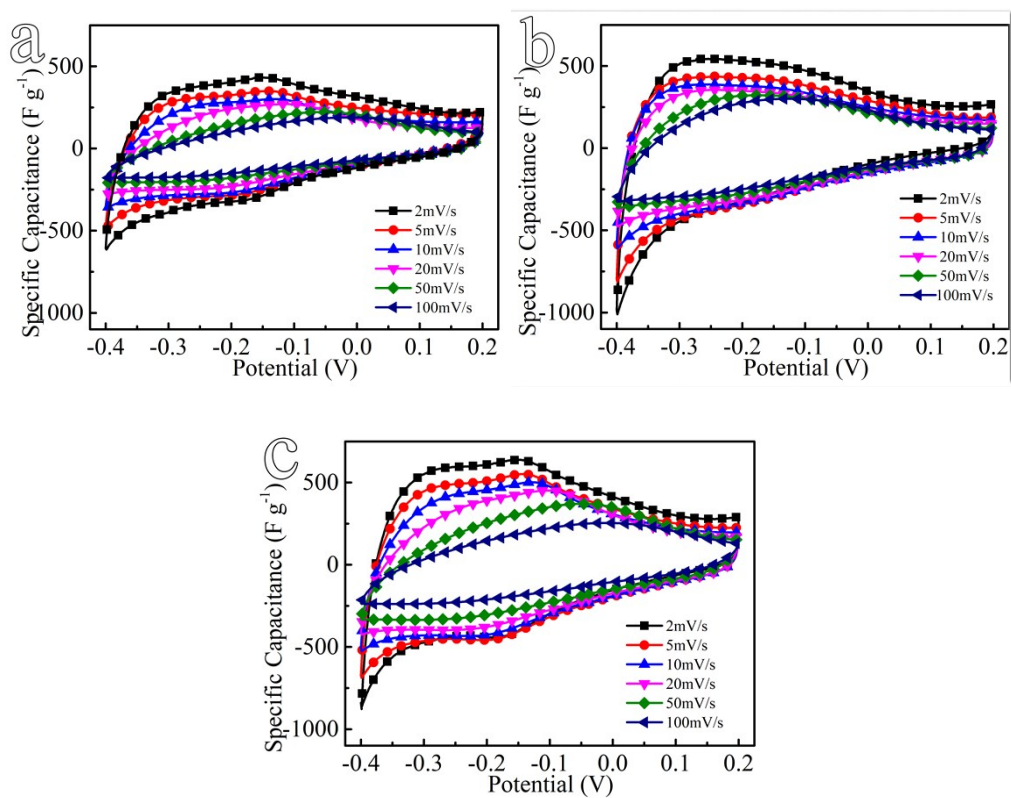

Fig.S6 CV curves at various scan rates for (a)  $\text{Ti}_3\text{C}_2\text{T}_x\text{-A}$ , (b)  $\text{Ti}_3\text{C}_2\text{T}_x\text{-H}$  and (c)  $\text{Ti}_3\text{C}_2\text{T}_x\text{-K}$



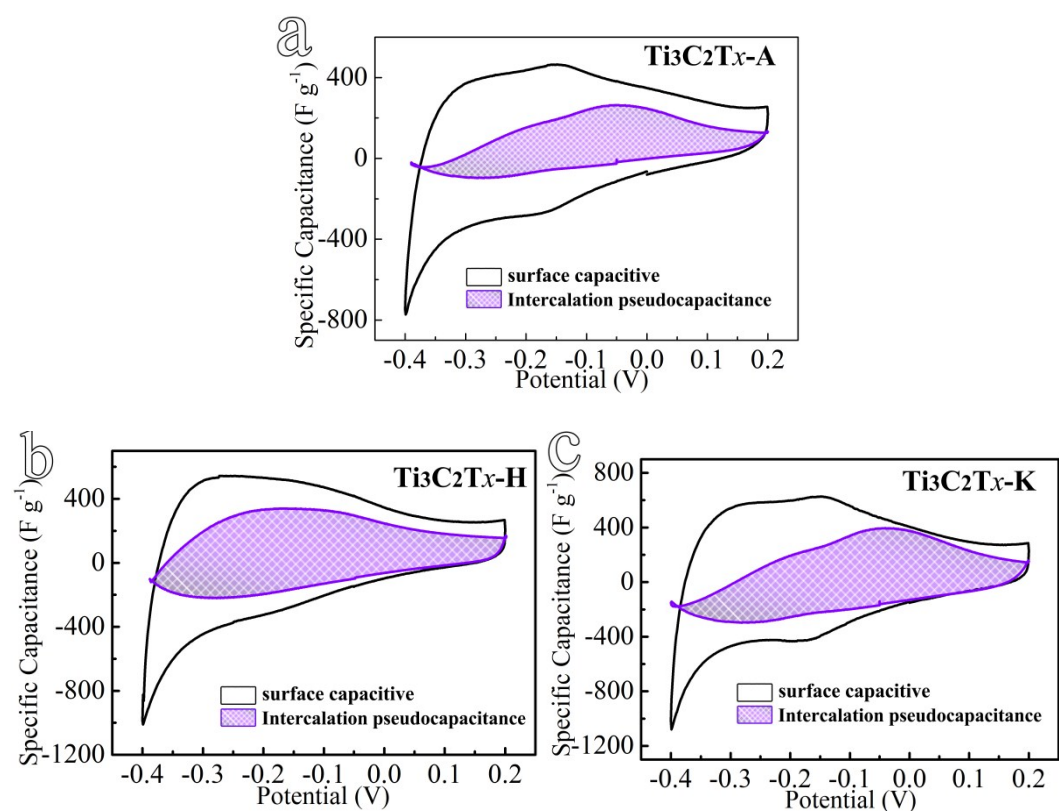

Fig.S7 Cyclic voltammetry profiles collected at 1mV/s (a) Ti<sub>3</sub>C<sub>2</sub>T<sub>x</sub>-A, (b) Ti<sub>3</sub>C<sub>2</sub>T<sub>x</sub>-H and (c) Ti<sub>3</sub>C<sub>2</sub>T<sub>x</sub>-K

Table S1 EDS result of the  $\text{Ti}_3\text{AlC}_2$ ,  $\text{Ti}_3\text{C}_2\text{T}_x\text{-A}$ ,  $\text{Ti}_3\text{C}_2\text{T}_x\text{-H}$  and  $\text{Ti}_3\text{C}_2\text{T}_x\text{-K}$ 

| Element (at.%)                             | Ti   | C    | O    | F    | Al   | Cl  | K   |
|--------------------------------------------|------|------|------|------|------|-----|-----|
| $\text{Ti}_3\text{AlC}_2$                  | 47.7 | 37.1 | -    | -    | 15.2 | -   | -   |
| $\text{Ti}_3\text{C}_2\text{T}_x\text{-A}$ | 38.2 | 30   | 18.5 | 11.6 | -    | 1.7 | -   |
| $\text{Ti}_3\text{C}_2\text{T}_x\text{-H}$ | 35   | 29.8 | 20.5 | 12.1 | -    | 2.6 | -   |
| $\text{Ti}_3\text{C}_2\text{T}_x\text{-K}$ | 34.1 | 31   | 19.4 | 11   | -    | 3   | 1.5 |

Table S2 Comparison of specific capacitance for different electrode materials

| Electrodes                                                   | Electrolyte                           | Mass loading<br>(mg cm <sup>-2</sup> ) | Scan rate<br>or<br>current density | Specific<br>capacitance<br>(F g <sup>-1</sup> ) | Areal<br>capacitance<br>(F cm <sup>-2</sup> ) | Ref.             |
|--------------------------------------------------------------|---------------------------------------|----------------------------------------|------------------------------------|-------------------------------------------------|-----------------------------------------------|------------------|
| Ti <sub>3</sub> C <sub>2</sub> T <sub>x</sub><br>Aerogel     | 1M KOH                                | 15                                     | 2 mV s <sup>-1</sup>               | 67                                              | 1012                                          | 10               |
| Ti <sub>3</sub> C <sub>2</sub> T <sub>x</sub> / CF           | 1M H <sub>2</sub> SO <sub>4</sub>     | 2.6                                    | 10 mV s <sup>-1</sup>              | 200                                             | 416                                           | 31               |
| Ti <sub>3</sub> C <sub>2</sub> T <sub>x</sub>                | 1M KOH                                | 7.6                                    | 2mV s <sup>-1</sup>                | 78                                              | 579                                           | 32               |
| Ti <sub>3</sub> C <sub>2</sub> T <sub>x</sub> /Ag<br>NP film | 1M Na <sub>2</sub> SO <sub>4</sub>    | 15                                     | 5mA cm <sup>-2</sup>               | 78                                              | 1173                                          | 33               |
| Ti <sub>3</sub> C <sub>2</sub> T <sub>x</sub> @Al            | 0.5M Na <sub>2</sub> SO <sub>4</sub>  | 20                                     | 1m A cm <sup>-2</sup>              | 54                                              | 1087                                          | 34               |
| RGO/MnO <sub>2</sub><br>hybrid paper                         | 1M Na <sub>2</sub> SO <sub>4</sub>    | 3.7                                    | 0.1 A g <sup>-1</sup>              | 243                                             | 897                                           | 35               |
| Ti <sub>3</sub> C <sub>2</sub> T <sub>x</sub> /NF            | 1M KOH                                | 4.8                                    | 5mV s <sup>-1</sup>                | 115                                             | 246                                           | 36               |
| RGo/Ni foam                                                  | 1M H <sub>2</sub> SO <sub>4</sub>     | 3.5                                    | 0.5 m A cm <sup>-2</sup>           | -                                               | 323                                           | 37               |
| <b>Ti<sub>3</sub>C<sub>2</sub>T<sub>x</sub>-A</b>            | <b>1M H<sub>2</sub>SO<sub>4</sub></b> | <b>2.5</b>                             | <b>2mV s<sup>-1</sup></b>          | <b>307</b>                                      | <b>768</b>                                    | <b>this work</b> |
| <b>Ti<sub>3</sub>C<sub>2</sub>T<sub>x</sub>-H</b>            | <b>1M H<sub>2</sub>SO<sub>4</sub></b> | <b>2.5</b>                             | <b>2mV s<sup>-1</sup></b>          | <b>374</b>                                      | <b>935</b>                                    | <b>this work</b> |
| <b>Ti<sub>3</sub>C<sub>2</sub>T<sub>x</sub>-K</b>            | <b>1M H<sub>2</sub>SO<sub>4</sub></b> | <b>2.4</b>                             | <b>2mV s<sup>-1</sup></b>          | <b>425</b>                                      | <b>1025</b>                                   | <b>this work</b> |
